# Supplementary material for: Dynamic architecture of the Escherichia coli structural maintenance of chromosomes (SMC) complex, MukBEF
Source: PubMed Central journal article supplement (PMC6765140; doi:10.1093/nar/gkz696), 2019-08-10
Supplement: gkz696_supplemental_file.pdf [file gkz696_supplemental_file.pdf]

## Supplementary figure S1

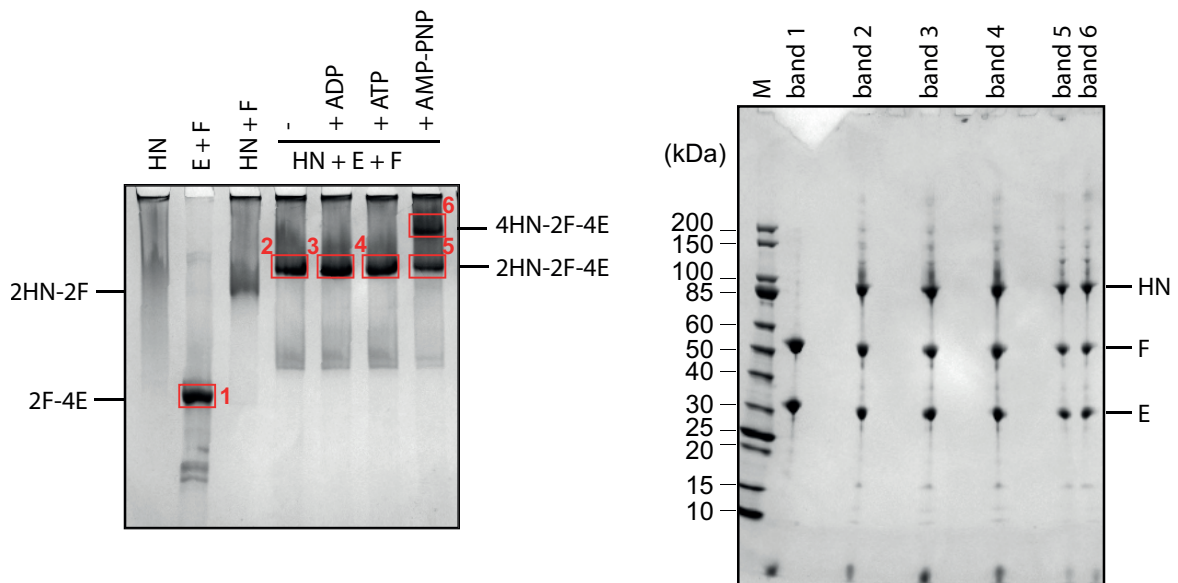

2D PAGE analysis of MukB HN complexes with MukFE . The protein samples containing MukBHN, MukF, MukE as in Figure 1A were resolved through 6% native PAGE. The indicated bands were cut out of the gel, soaked in SDS loading buffer and resolved in 4-20% gradient SDS PAGE.

## Supplementary figure S2

### Native MS

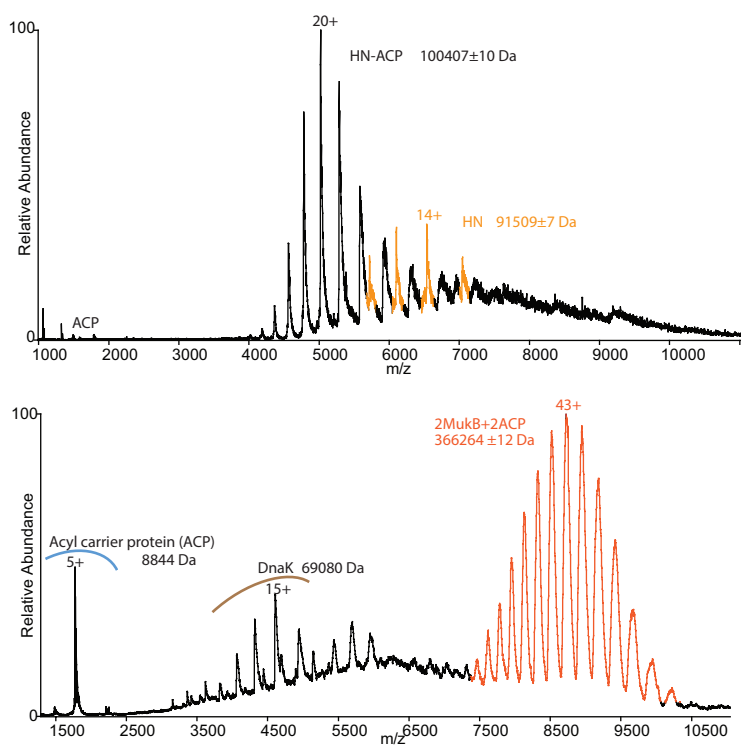

Mass spectrometry reveals stoichiometric binding of ACP-4'phosphopantetheine to MukB and MukBHN. **A** Native mass spectra of MukBHN and MukB. The predicted mass for MukBHN (His-tag) and MukBHN (his-tag)-ACP-4'phosphopantetheine are 91584.7 Da and 100224.22Da, and for 2MukB (His-tag) and 2MukB (His-tag) – 2ACP-4'phosphopantetheine are 345561.74Da and 362840.75Da, respectively.

### Supplementary figure S3

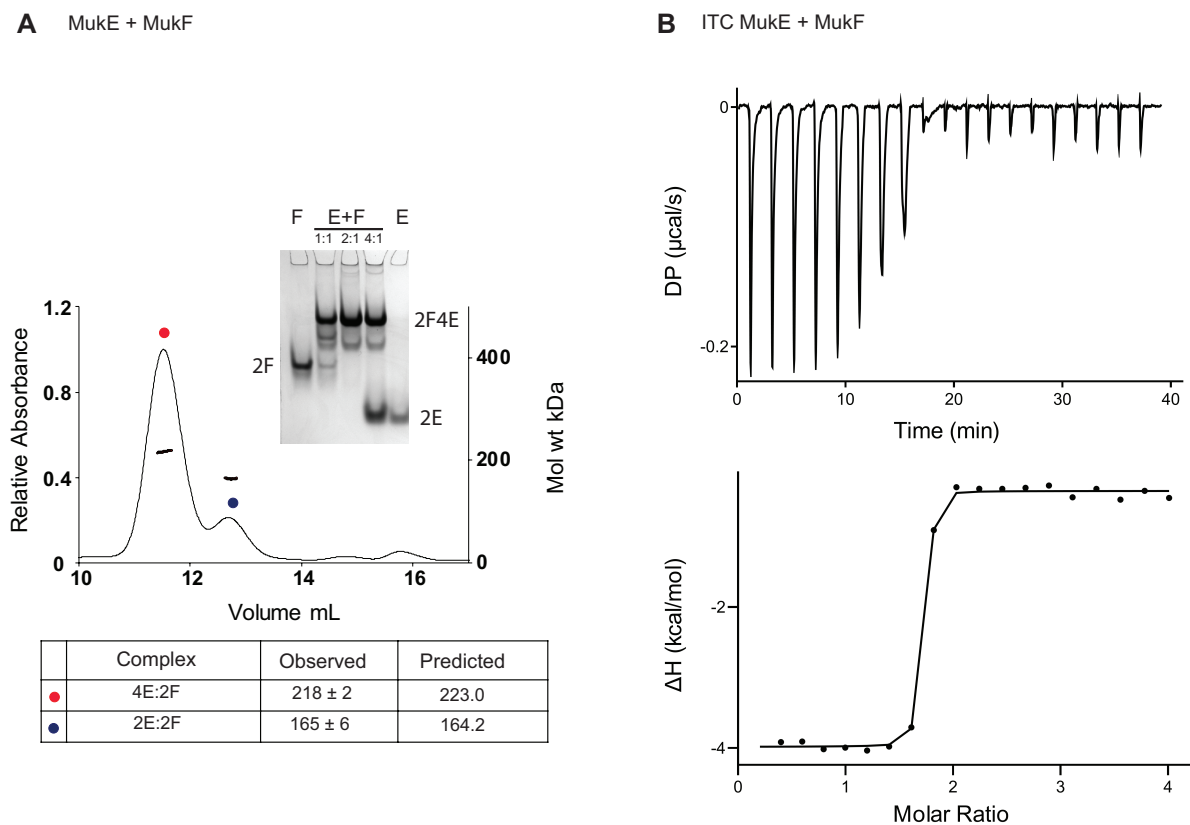

Tight interaction between MukF and MukE. **A** SEC-MALS of MukE-MukF complexes on Superdex 200 column with 100  $\mu\text{L}$  of 10  $\mu\text{M}$  MukF and 20  $\mu\text{M}$  MukE. Inset figure shows a 6 % native PAGE. Lanes from left to right are 5  $\mu\text{M}$  MukF, 5  $\mu\text{M}$  MukE + 5  $\mu\text{M}$  MukF, 10  $\mu\text{M}$  MukE + 5  $\mu\text{M}$  MukF, 20  $\mu\text{M}$  MukE + 5  $\mu\text{M}$  MukF, 5  $\mu\text{M}$  MukE. **B** ITC binding isotherm of 400  $\mu\text{M}$  MukE titrated into 20  $\mu\text{M}$  MukF at 25  $^{\circ}\text{C}$  in an ITC 200. Fitted parameters for a single binding site model from three independent measurements were  $N=1.87 \pm 0.24$ ,  $K_d=6.97 \pm 2.6$  nM,  $\Delta H=-14.5 \pm 0.15$  kcal mol $^{-1}$ ,  $T\Delta S=-32.1$  kJ mol $^{-1}$  MukE monomers bound to a middle region of MukF have interacting surfaces with both monomers of a MukB head (total buried surface area estimated from *H. ducreyi* engaged heads complex (24) is 344  $\text{\AA}^2$  and 630  $\text{\AA}^2$ )

### Supplementary figure S4

**A**

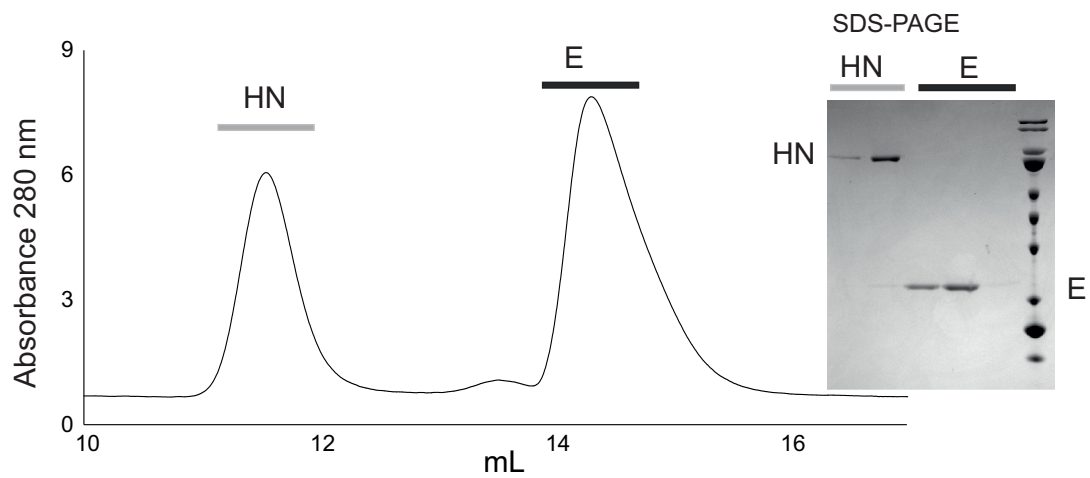

**B**

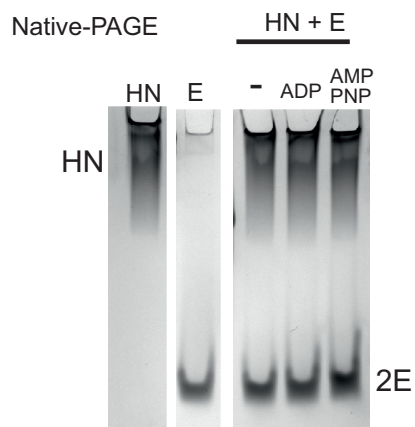

MukE requires MukF for stable interaction with MukB. **A** SEC of samples containing HN (10  $\mu$ M) and MukE (10  $\mu$ M). Inset, SDS PAGE of peak fractions as indicated. **B** Native PAGE of samples containing HN and MukE, in the absence and presence of the indicated nucleotides.

Supplementary figure S5

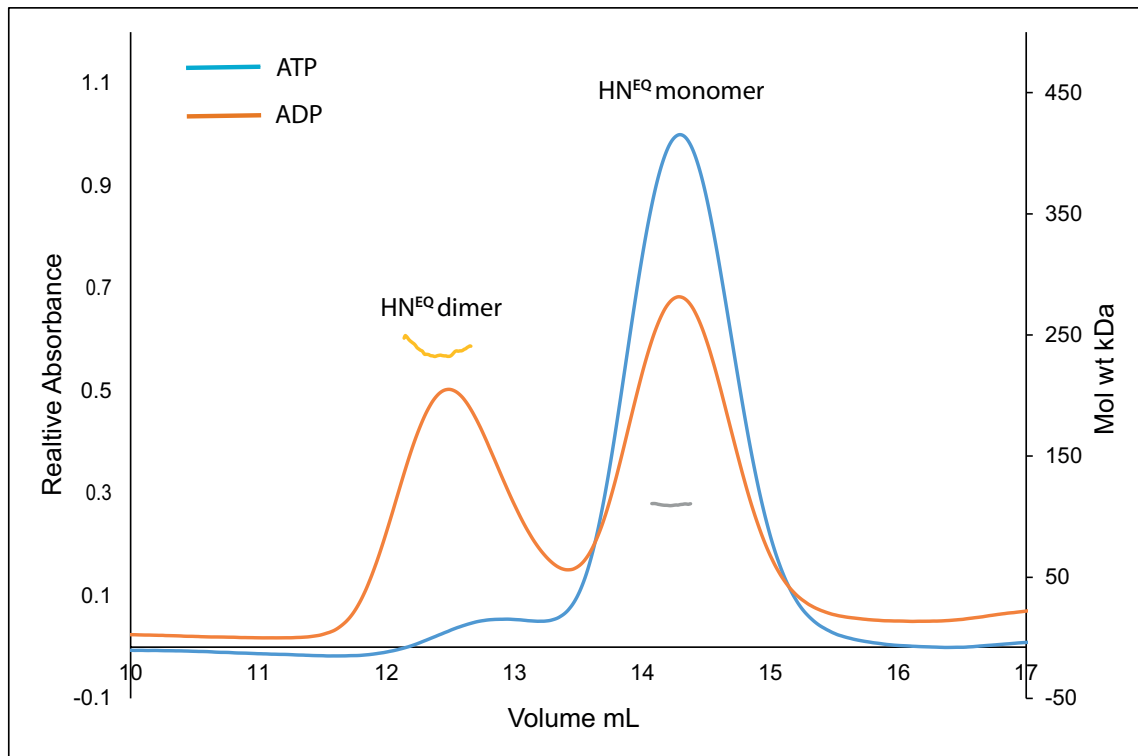

HN<sup>EQ</sup> dimerises in the presence of ATP independently of MukF presence. The SEC-MALS analysis of samples incubated in the presence of ATP (orange trace) or ADP (blue trace) for 3hrs prior to resolution on Superdex 200 column.

Supplementary figure S6

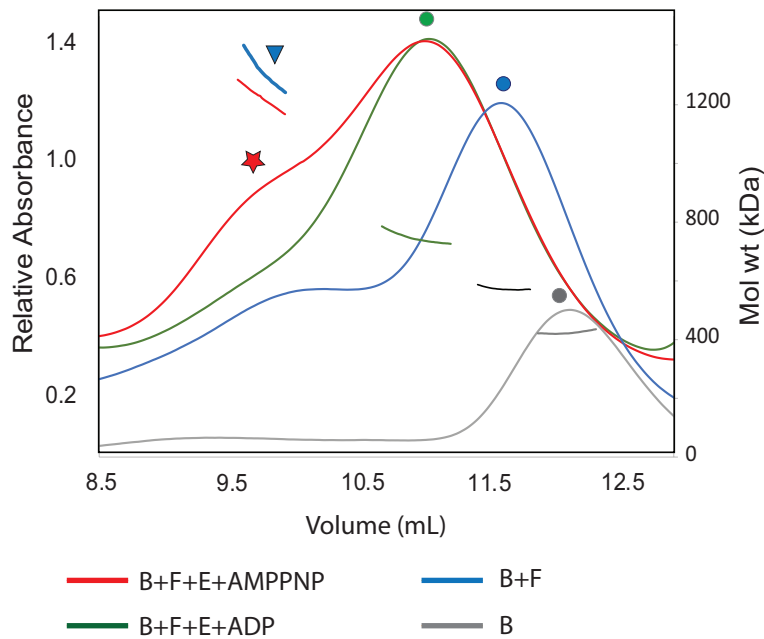

|   | Complex     | Observed (kDa) | Predicted (kDa) |
|---|-------------|----------------|-----------------|
| ★ | 4B-2F-4E    | 1205 ± 35      | 951             |
| ● | 2B-2F-4E    | 720 ± 21       | 587             |
| ▼ | 4B-2F/2B-4F | 1252 ± 38      | 797/810         |
| ● | 2B-2F       | 555 ± 16       | 469             |
| ● | 2B          | 405 ± 28       | 364             |

MukBEF complexes generated with full length MukB can form dimer of dimers in the presence of AMPPNP. SEC-MALS of MukB, MukF and MukE complexes. The proteins were at concentrations 5 $\mu$ M B, 2.5 $\mu$ M F and 5 $\mu$ M E. Separation was through Superose 6 column. The observed masses are higher than those predicted. In the sample of B+F, this is partly because of likely higher order complexes containing additional F dimers, in addition to 4B-2F complexes (see main text).

Supplementary figure S7

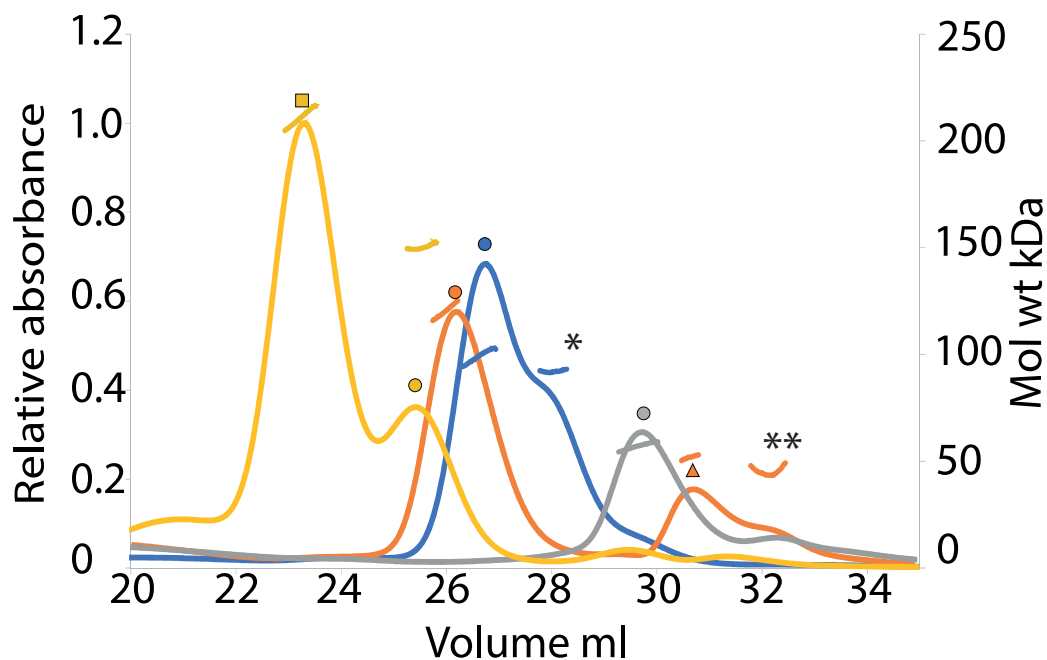

|   |             | Complex | Observed(kDa) | Predicted (kDa) |
|---|-------------|---------|---------------|-----------------|
| ● | MukFWT      | 2F      | 99.2          | 105.4           |
| ● | MukFWT&MukE | 2F-2E   | 150.0         | 162.4           |
| ■ |             | 2F-4E   | 210.0         | 223.0           |
| ● | MukFm       | 1F      | 57.3          | 52.7            |
| ● | MukFm&MukE  | 1F-2E   | 120.0         | 140.9           |
| ▲ | MukE        | 2E      | 42.0          | 58.8            |

Monomeric MukF variant forms complexes with MukE *in vitro*. The samples containing 20  $\mu$ M (monomer conc.) of MukF or MukF<sup>M</sup> and 40 $\mu$ M MukE were separated on S200 column. A shoulder of a peak containing MukF (blue trace) reflects a presence of proteolytically degraded protein in this purified fraction (mass 93.4 kDa). The observed mass of MukE defers substantially from the predicted mass, most likely because the peak contains MukE in dynamic equilibrium of constantly exchanging monomeric and dimeric forms, as observed by others previously (31,32). A small shoulder off this peak (mass 32kDa) might be a monomeric MukE or a contaminant.

## Supplementary figure S8

### A MukF in $\gamma$ -Proteobacteria

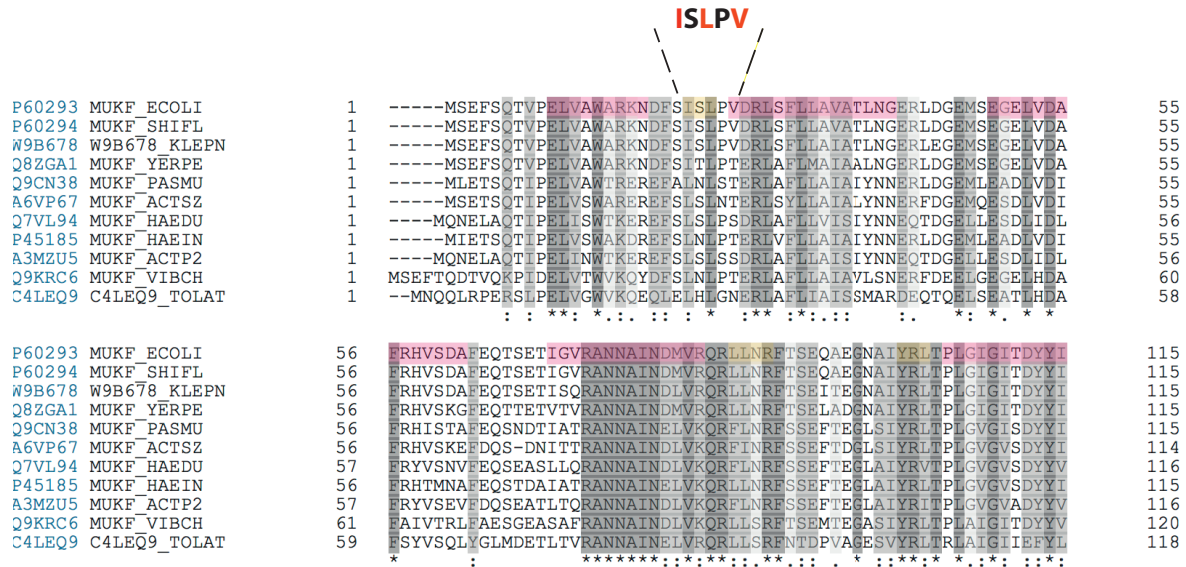

### B MukF vs ScpA

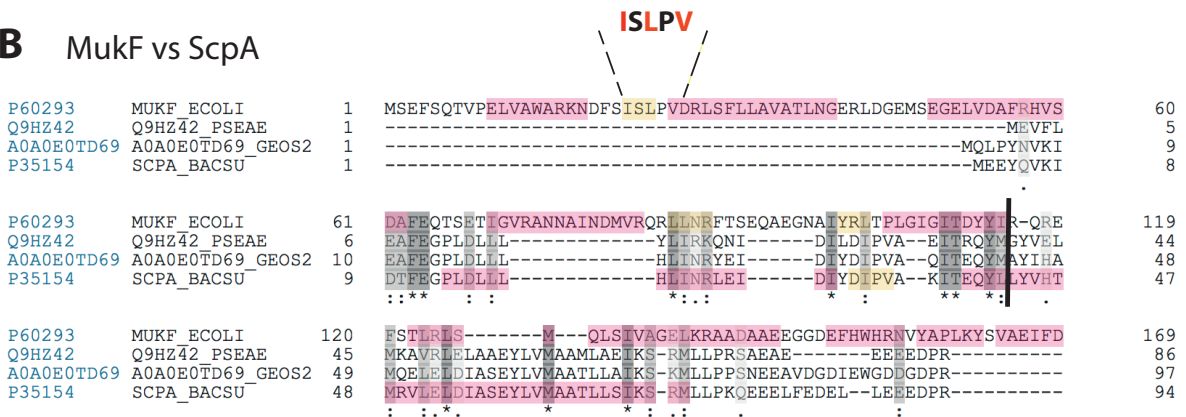

The structural elements supporting MukF dimerization interface are highly conserved in  $\gamma$ -Proteobacteria but absent in distant bacterial species. **A** An amino acid sequence alignment of MukF proteins from  $\gamma$ -Proteobacteria. Only the globular part of the N-terminal domain is shown. Conservation is highlighted in grey – the colour intensity parallels the level of conservation, with the highest level being indicated in darkest grey. The structural elements of *E. coli* MukF are marked:  $\alpha$  helices in pink -  $\beta$  strands in yellow. The sequence motif in dimerization interface is enhanced and mutagenized residues in MukF<sup>M</sup> are shown in red. **B**

The elements supporting MukF dimerisation domain are missing in kleisins from more distant bacterial species, such as *Pseudomonas aeruginosa*, *Geobacillus* sp. and *Bacillus subtilis*. The black bar marks the end of *E.coli* MukF globular N-terminal domain.

### Supplementary table S1

#### Predicted mass of MukBEF complex components and their variants.

| Protein variant             | Predicted mass* (Da) | Predicted mass +ACP** (Da) |
|-----------------------------|----------------------|----------------------------|
| 2MukB (-His tag)            | 345561.74            | 363521.45                  |
| HN WT(-His tag)             | 91584.7              | 100564.57                  |
| HN SR (-His tag)            | 91653.81             | 100633.68                  |
| HN EQ (-His tag)            | 91583.72             | 100563.59                  |
| HN <sup>C*</sup> (-His tag) | 91373.44             | 100353.31                  |
| 2F (-His tag)               | 105800.78            |                            |
| 2E (-His tag)               | 58734.06             |                            |
| F <sup>M</sup> (-His tag)   | 52891.25             |                            |
| 2FN10 (-His tag)            | 85515.48             |                            |

\*The mass includes first methionine.

\*\*MW ACP-4'phosphopanetheine 8979.87 Da

### Supplementary table S2

#### Mass of MukBHN/MukB complexes with MukFE in presence of AMPPNP in mass spectroscopy assays.

| Complex   | Predicted mass (Da) | Observed mass (Da)* | Predicted mass with bound ACP-4'Ppant (Da) |
|-----------|---------------------|---------------------|--------------------------------------------|
| 2HN-2F-4E | 406438              | 424831±45           | 424398                                     |
| 3HN-2F-4E | 498023              | 526362±7            | 525468                                     |
| 4HN-2F-4E | 589607              | 624470±47           | 626538                                     |



\*The observed values represent masses of complexes determined in the sample illustrated in Figure 2E bottom panel. The mass of 2HN-2F-4E complex in samples without nucleotide or with ADP/ATP were  $425555 \pm 50$ ,  $425234 \pm 45$ , and  $424704 \pm 1\text{Da}$ , respectively. Predicted masses include ACP with its prosthetic group 4'phosphopantetheine (Angellini et al.2012) and AMPPNP (506Da) where appropriate.

### Supplementary table S3

#### Mutated variants of MukB and MukF

| mutated variant  | location in MukB/F     | alteration(s) in MukB/F amino acid sequence | function impaired                     |
|------------------|------------------------|---------------------------------------------|---------------------------------------|
| HN- SR           | signature loop         | S1366R                                      | head engagement*                      |
| HN - EQ          | Walker B               | E1407Q                                      | ATP hydrolysis**                      |
| HN <sup>C*</sup> | cap                    | F1453S H1458A R1465A                        | Interaction with MukF C-ter domain*** |
| HN <sup>N*</sup> | neck                   | L1219K L1226K                               | Interaction with MukF 4HB**           |
| F <sup>M</sup>   | dimerisation interface | I22T L24N V26T                              | MukF dimerisation***                  |

\* Woo et al, 2009, Badrinarayanan et al., 2012

\*\* Zawadzka et al., 2018

\*\*\* this work

### Supplementary table S4

#### MukB ATPase activity stimulated by MukF<sup>M</sup>.

| Protein           | ATP molecules hydrolysed/<br>MukB dimer/min $\pm$ SD | % activity |
|-------------------|------------------------------------------------------|------------|
| MukF WT           | $23.3 \pm 1.50$                                      | 100        |
| MukF <sup>M</sup> | $20.9 \pm 0.89$                                      | 90         |

Concentrations in assays were: MukB, 0.5 $\mu$ M, MukF/F<sup>M</sup>1.25 $\mu$ M. The values represent averages of initial rates from 3 experiments  $\pm$ SD.
